# Supplementary material for: Enzyme-instructed self-aggregation of Fe3O4nanoparticles for enhanced MRIT2imaging and photothermal therapy of tumors
Source: Royal Society of Chemistry journal article supplement (doi:10.1039/c9nr09235h), 2019-12-16
Supplement: c9nr09235h1.pdf [file c9nr09235h1.pdf]

## Supporting Information

### Enzyme-instructed self-aggregation of Fe<sub>3</sub>O<sub>4</sub> nanoparticles for enhanced MRI T<sub>2</sub> imaging and photothermal therapy of tumor

Yaguang Wang,<sup>‡a</sup> Xiaohu Li,<sup>‡a</sup> Peiyao Chen,<sup>b</sup> Yu Dong,<sup>b</sup> Gaolin Liang,<sup>\*b</sup> and Yongqiang Yu<sup>\*a</sup>

a. Department of Radiology, The First Affiliated Hospital, Anhui Medical University, Hefei, Anhui 230022, China.

b. CAS Key Laboratory of Soft Matter Chemistry, Department of Chemistry, University of Science and Technology of China, Hefei, Anhui 230026, China.

<sup>‡</sup>These authors contributed equally

\*Corresponding authors: yuyongqiang@ahmu.edu.cn (Y. Y.); gliang@ustc.edu.cn (G. L.)

## Contents

### 1. Syntheses of compounds

### 2. Calculation of the photothermal conversion efficiency

### 3. Supporting figures and tables

## Contents

### 1. Syntheses of compounds

Compound of Acetyl-Arg-Val-Arg-Arg-Cys (StBu)-Lys (compound A) was synthesized with solid phase peptide synthesis (SPPS). Isobutyl chloroformate (IBCF, 8.7 μL, 0.12 mmol) was added to a mixture of compound A (180 mg, 0.1 mmol) and 4-methylmorpholine (MMP, 8.5 μL, 0.15 mmol) in THF (1.5 mL) at 0°C under N<sub>2</sub>. The reaction mixture was stirred for 30 min. The solution of 2-cyano-6-aminobenzothiazole (CBT, 18 mg, 0.1 mmol) was added to the reaction mixture and further stirred at 0°C for 1 h. Then the mixture was stirred overnight at room temperature. After the compound B (70mg, yield: 30%) was purified with HPLC, The Pbf and Boc protecting groups were removed with 95% TFA in CH<sub>2</sub>Cl<sub>2</sub> for 3h. The pure product compound 1 (20 mg, 50%) was obtained after HPLC purification.

### 2. Calculation of the photothermal conversion efficiency

The photothermal conversion efficiency of SPIO@1NPs before and after the aggregation were determined according to previous method<sup>1</sup>. Detailed calculation was given as following:

$$\eta = \frac{m \cdot c (T_{\max} - T_{\max, H_2O})}{I(1 - 10^{-A_\lambda}) \cdot \tau_s}$$

where  $m$  is the solution mass (pure water),  $c$  is the heat capacity of solvent (4.2 J/g),  $T_{\max}$  and  $T_{\max, H_2O}$  are the temperature change of the NPs and solution suspensions at the maximum steady-state temperature, respectively,  $I$  is the laser power density (5W/cm<sup>2</sup>),  $A_\lambda$  is the absorbance of the NPs solution at 808 nm, and  $\tau_s$  is sample system time constant ( Figure S7).

### 3. Supporting figures and tables

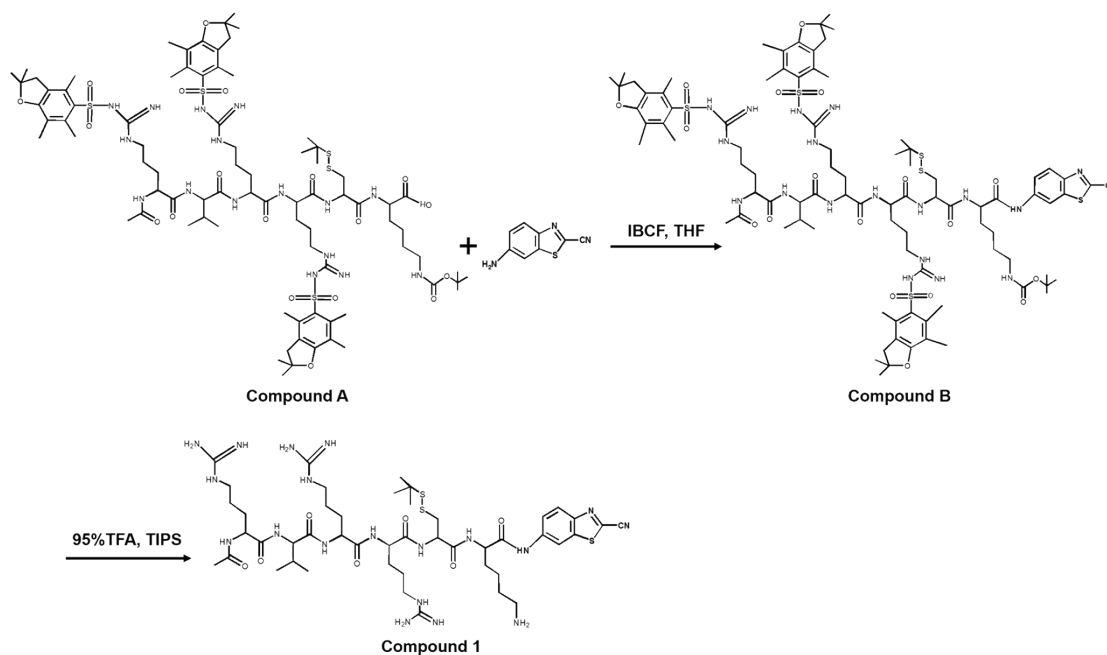

**Scheme S1.** Chemical syntheses of compound 1.

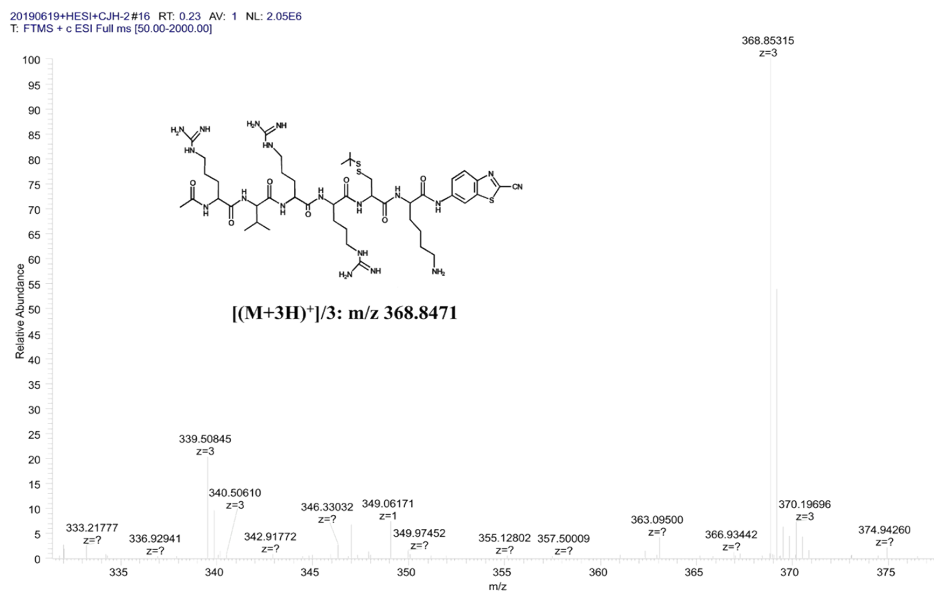

**Figure S1.** HR-ESI/MS spectrum of compound 1.

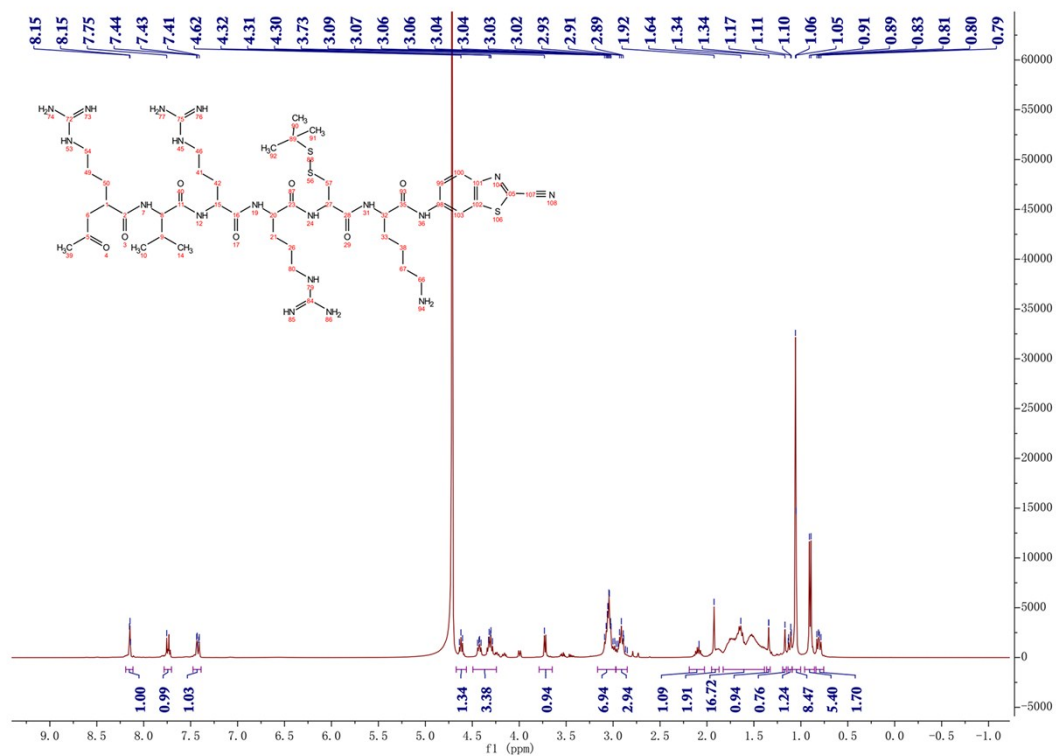

**Figure S2.**  $^1\text{H}$  NMR spectrum of compound 1.

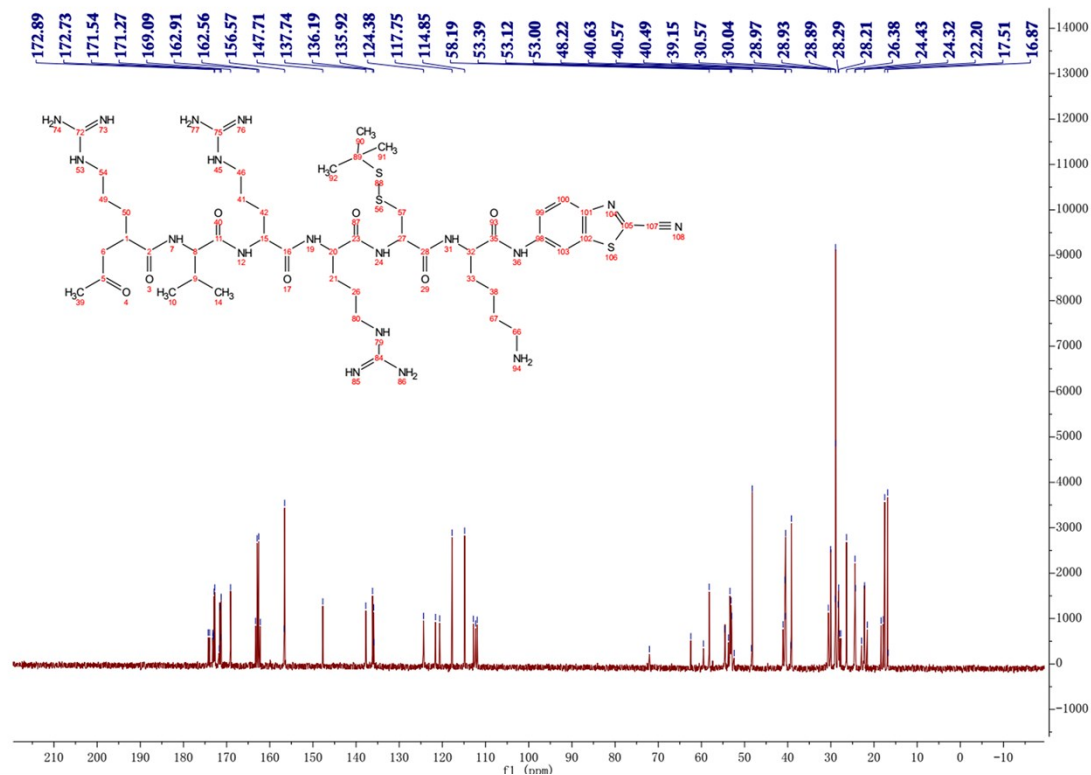

**Figure S3.**  $^{13}\text{C}$  NMR spectrum of compound 1.

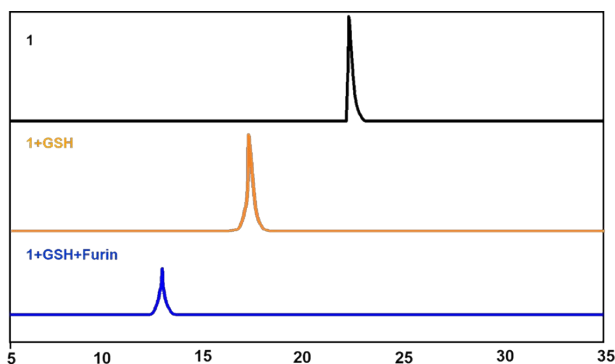

**Figure S4.** HPLC traces of 100  $\mu\text{M}$  compound 1 (black), 100  $\mu\text{M}$  compound 1 treated with 1 mM GSH for 2 h (orange), 100  $\mu\text{M}$  compound 1 treated with 1 mM GSH and 1 n mol/U of furin at 37  $^{\circ}\text{C}$  for 6 h (blue).

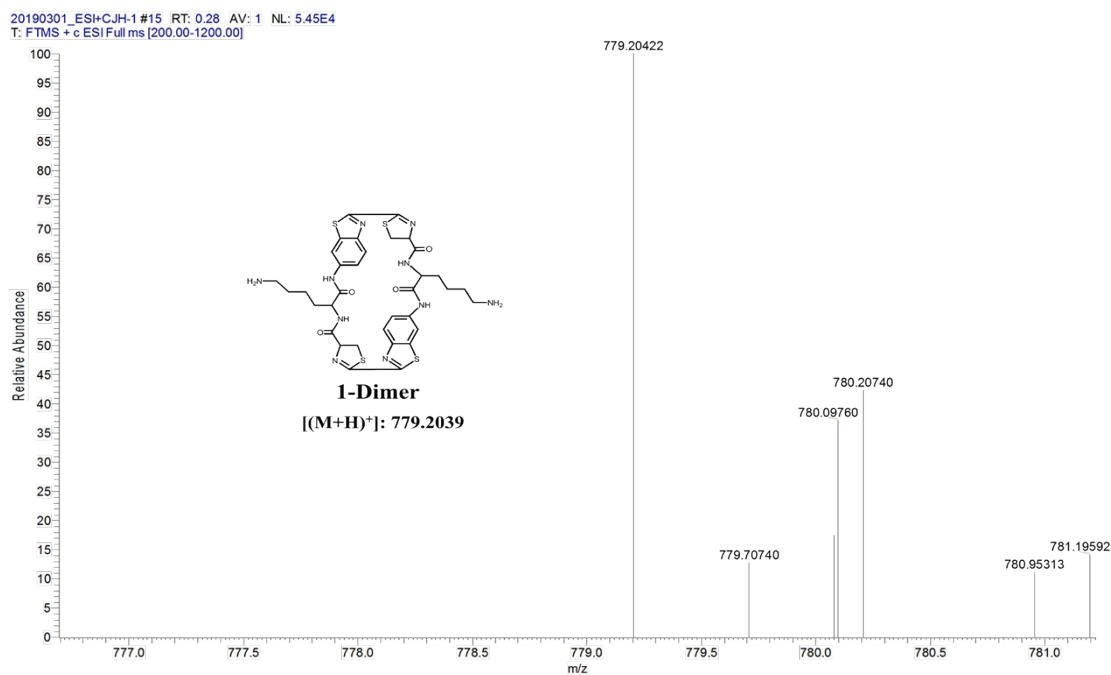

**Figure S5.** HR-ESI/MS spectrum of HPLC peaks of HPLC peak at 15 min in figure S4.

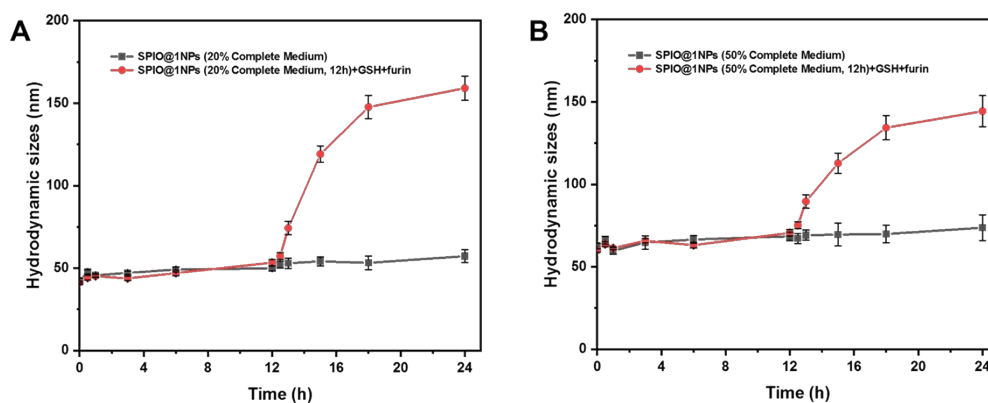

**Figure S6.** Hydrodynamic diameter of SPIO@1NPs pre-incubated in PBS buffer containing 20% complete medium (A), 50% complete medium (B) for 12h, then incubated with GSH (1 mM) and of furin (1 nmol/U) and without for another 12 h.

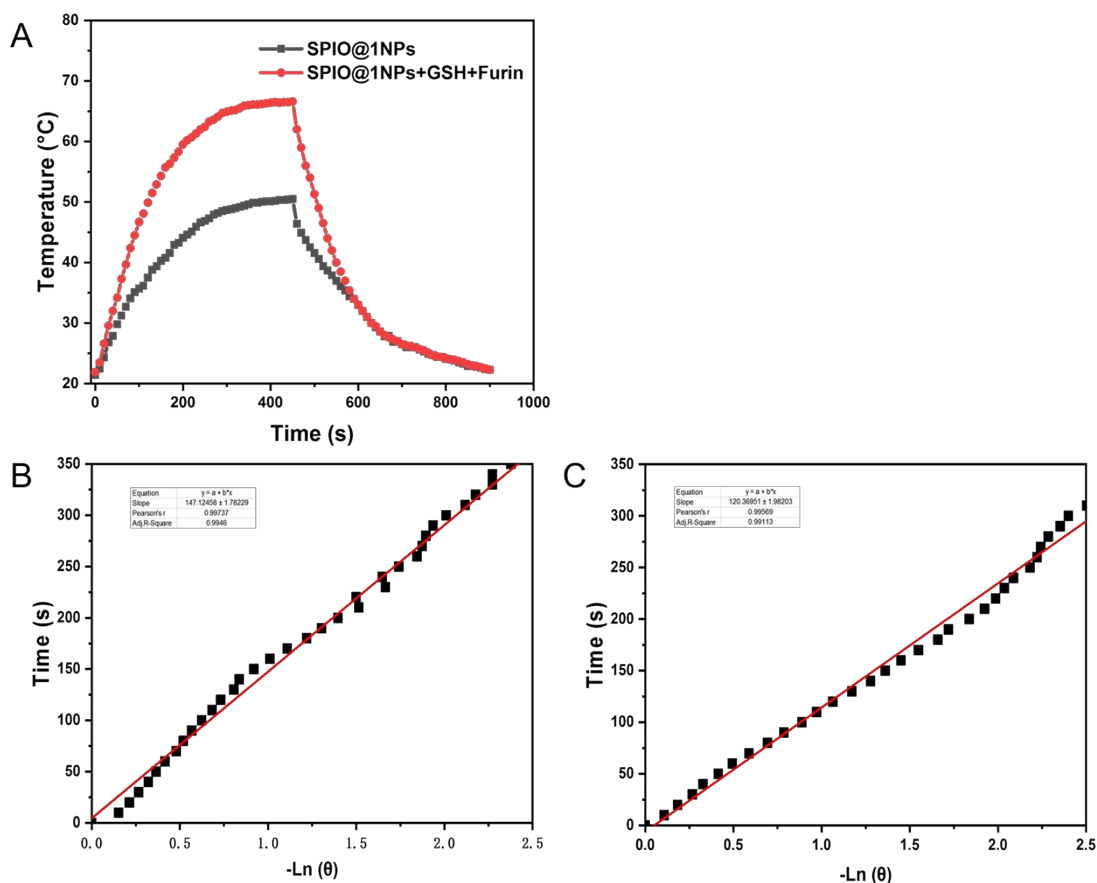

**Figure S7.** (A) The photothermal heating curves of SPIO@1NPs and SPIO@1NPs treated with GSH and furin under laser irradiation. Linear fitting of the cooling time data (after 450 s) of the curves of the SPIO@1NPs (B) and SPIO@1NPs treated with GSH and furin (C) versus the responding negative natural logarithm of the temperature driving force ( $\theta$ ) to obtain their system time constant ( $\tau_s$ ).

**Table S1.** HPLC condition for the purification of compound 1

| <b>Time (min)</b> | <b>Flow (ml/min)</b> | <b>H<sub>2</sub>O%<br/>(0.1%TFA)</b> | <b>CH<sub>3</sub>OH%<br/>(0.1%TFA)</b> |
|-------------------|----------------------|--------------------------------------|----------------------------------------|
| 0                 | 12.0                 | 80                                   | 20                                     |
| 3                 | 12.0                 | 80                                   | 20                                     |
| 35                | 12.0                 | 20                                   | 80                                     |
| 37                | 12.0                 | 20                                   | 80                                     |
| 38                | 12.0                 | 80                                   | 20                                     |
| 40                | 12.0                 | 80                                   | 20                                     |

### References

1. Ding, X., Liow, C.H., Zhang, M., Huang, R., Li, C., Shen, H., Liu, M., Zou, Y., Gao, N., Zhang, Z., Li, Y., Wang, Q., Li, S. and Jiang, J., *J AM CHEM SOC*, 2014, **136**, 15684-15693.
